# Supplementary material for: Inhibition of Advanced Glycation End-Products by Tamarindus indica and Mitragyna inermis Extracts and Effects on Human Hepatocyte and Fibroblast Viability
Source: MDPI journal article supplement (doi:10.3390/molecules28010393), 2023-01-02
Supplement: s1 [file s1]

## Supplementary Materials

Article

# Inhibition of Advanced Glycation End-Products by *Tamarindus indica* and *Mitragyna inermis* Extracts and Effects on Human Hepatocyte and Fibroblast Viability

Relwendé Justin Ouédraogo <sup>1,2,\*</sup>, Umair Aleem <sup>3</sup>, Lassina Ouattara <sup>1,2</sup>, Muhammad Nadeem-ul-Haque <sup>4</sup>, Georges Anicet Ouédraogo <sup>1,2</sup>, Humera Jahan <sup>3,\*</sup> and Farzana Shaheen <sup>4,\*</sup>

<sup>1</sup> Department of Biochemistry-Microbiology, Unit of Training and Research in Life and Earth Sciences, Nazi Boni University, Bobo-Dioulasso 01 BP 1091, Burkina Faso

<sup>2</sup> Laboratory of Research and Teaching in Animal Health and Biotechnology, Nazi Boni University, Bobo-Dioulasso 01 BP 1091, Burkina Faso

<sup>3</sup> Dr. Panjwani Center for Molecular Medicine and Drug Research, International Center for Chemical and Biological Sciences, University of Karachi, Karachi 75270, Pakistan

<sup>4</sup> Third World Center for Science and Technology, Hussain Ebrahim Jamal Research Institute of Chemistry, University of Karachi, Karachi-75270, Pakistan

\* Correspondence: rjustino14@yahoo.com (R.J.O.), jahan\_pcmd@yahoo.com (H.J.); afnan.iccs@gmail.com (F.S.); Tel.: +226-75386260 (R.J.O.); +92-21-111-232-292 (H.J.); +92-331-3859073 (F.S.)

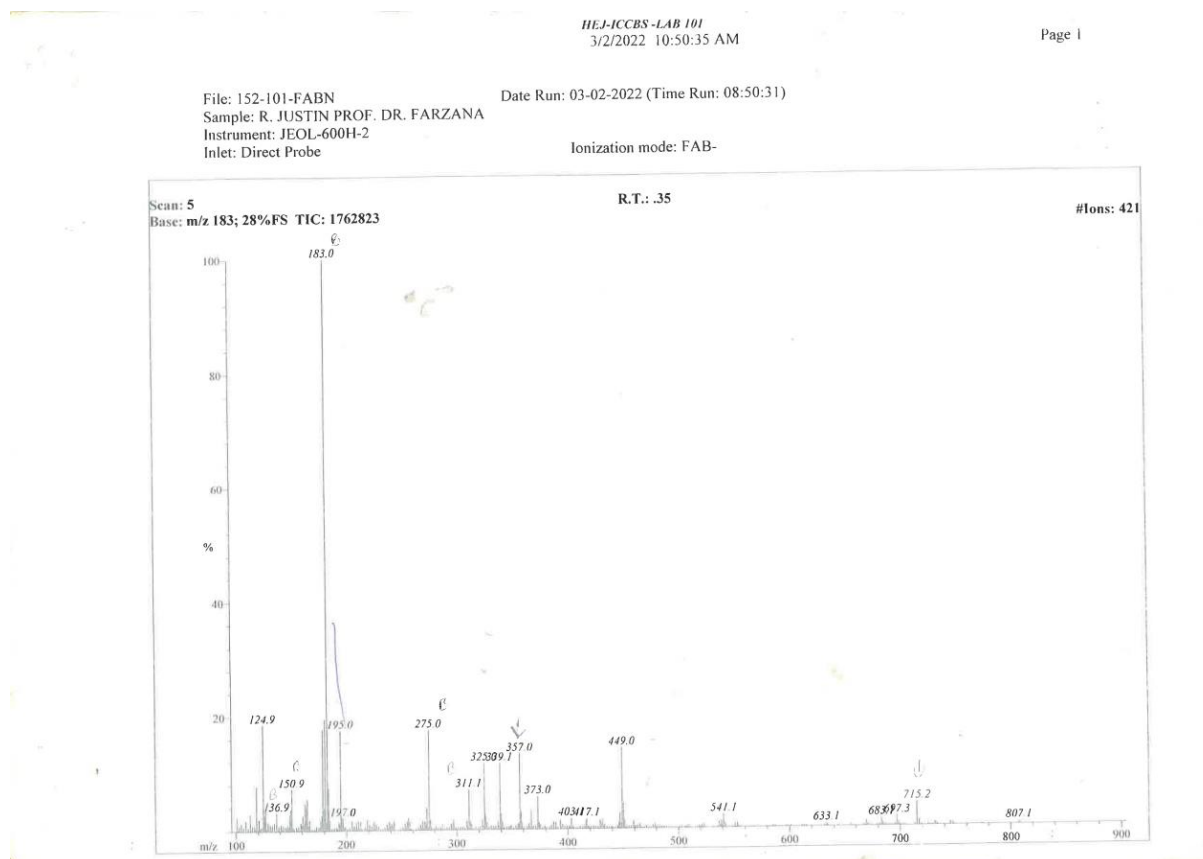

Figure S1: FABMS spectrum of compound 1

| HEJ-MASS LAB -ICCBS |                  |                     |             | JEOL HX 110 MASS SPECTROMETER (FAB-HR) |                 |          |
|---------------------|------------------|---------------------|-------------|----------------------------------------|-----------------|----------|
| STUDENT NAME        |                  | R. JUSTIN           |             | SAMPLE CODE                            | DATE            | 7/3/2022 |
| SUPERVISOR NAME     |                  | DR. FARZANA SHAHEEN |             | R-152-101                              | FAB (+VE / -VE) | +VE MODE |
| Measured Mass       | Theoretical Mass | Delta [ppm]         | Delta [mmu] | RDB                                    | Composition     |          |
| 359.1511            | 359.1495         | 4.6                 | 1.6         | 9.5                                    | C20 H23 O6      |          |
| 359.1511            | 359.1553         | -11.8               | -4.2        | 0.5                                    | C13 H27 O11     |          |
| 359.1436            | 359.1436         | 20.9                | 7.5         | 18.5                                   | C27 H19 O1      |          |
| 357.1355            | 357.1338         | 4.7                 | 1.7         | 10.5                                   | C20 H21 O6      |          |
| 357.1397            | 357.1397         | -11.7               | -4.2        | 1.5                                    | C13 H25 O11     |          |
| 357.1279            | 357.1279         | 21.2                | 7.6         | 19.5                                   | C27 H17 O1      |          |

*Handwritten notes:*  
 $m = 23 - 11 = 12$   
 $n = 23 - 10 = 13$   
 $C_{20}H_{23}O_6$   
 $C_{20}H_{21}O_6$

Figure S2: HRFABMS spectrum of compound 1

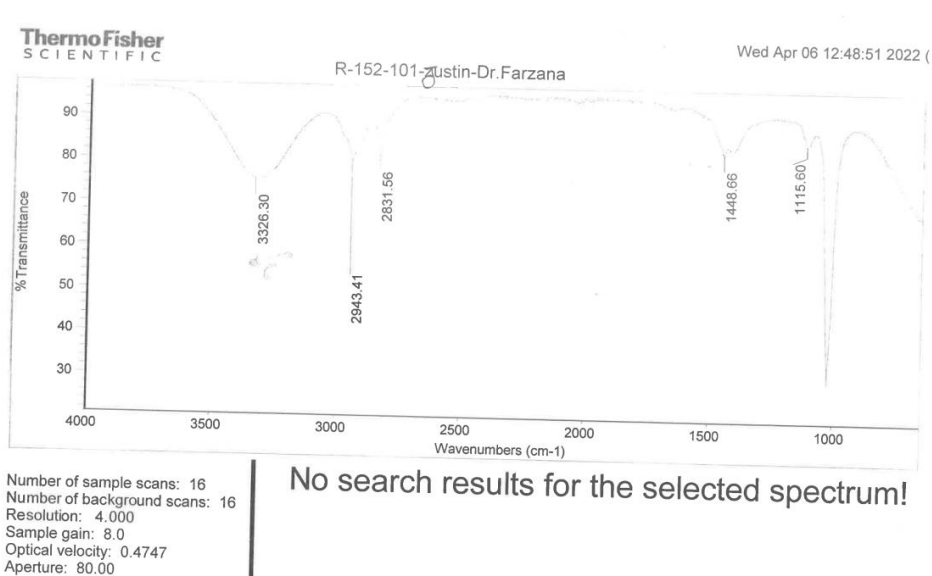

Figure S3 : IR spectrum of compound 1

## THERMO ELECTRON ~ VISIONpro SOFTWARE V4.10

Operator Name Zainab Date of Report 4/7/2022  
 Department Analytical Lab Nanotechnology center Time of Report 11:19:46AM  
 Organization ICCBS, Karachi University  
 Information Justin/Dr.Farzana

## Scan Graph

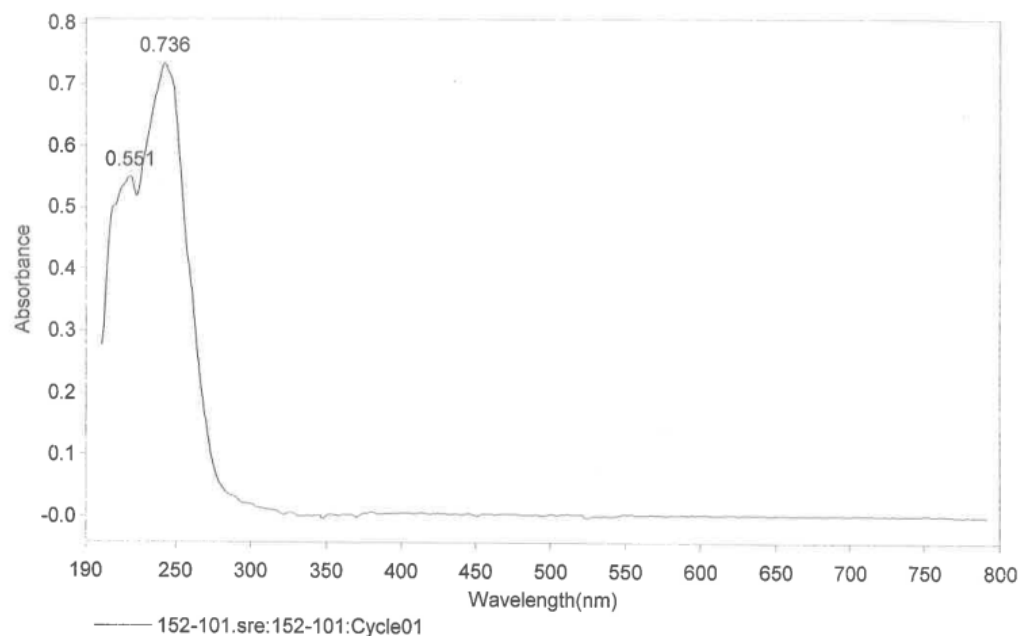

## Results Table - 152-101.sre,152-101,Cycle01

| nm          | A      | Peak Pick Method             |
|-------------|--------|------------------------------|
| 220.00      | 0.551  | Find 8 Peaks Above -3.0000 A |
| 243.00      | 0.736  | Start Wavelength 190.00 nm   |
|             |        | Stop Wavelength 300.00 nm    |
|             |        | Sort By Wavelength           |
| Sensitivity | Medium |                              |

**Figure S4 :** UV/UV-Visible (MeOH) spectrum of compound **1**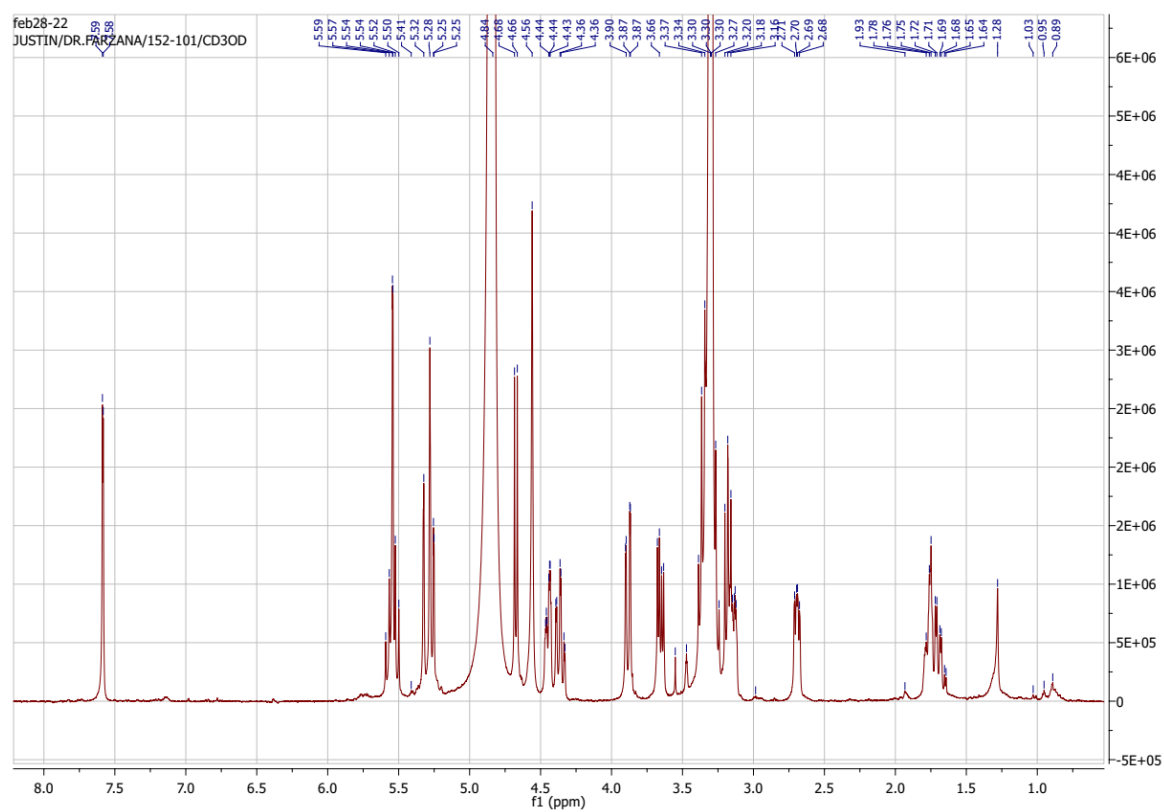**Figure S5:**  $^1\text{H}$  NMR (400 MHz,  $\text{CD}_3\text{OD}$ ) spectrum of compound **1**

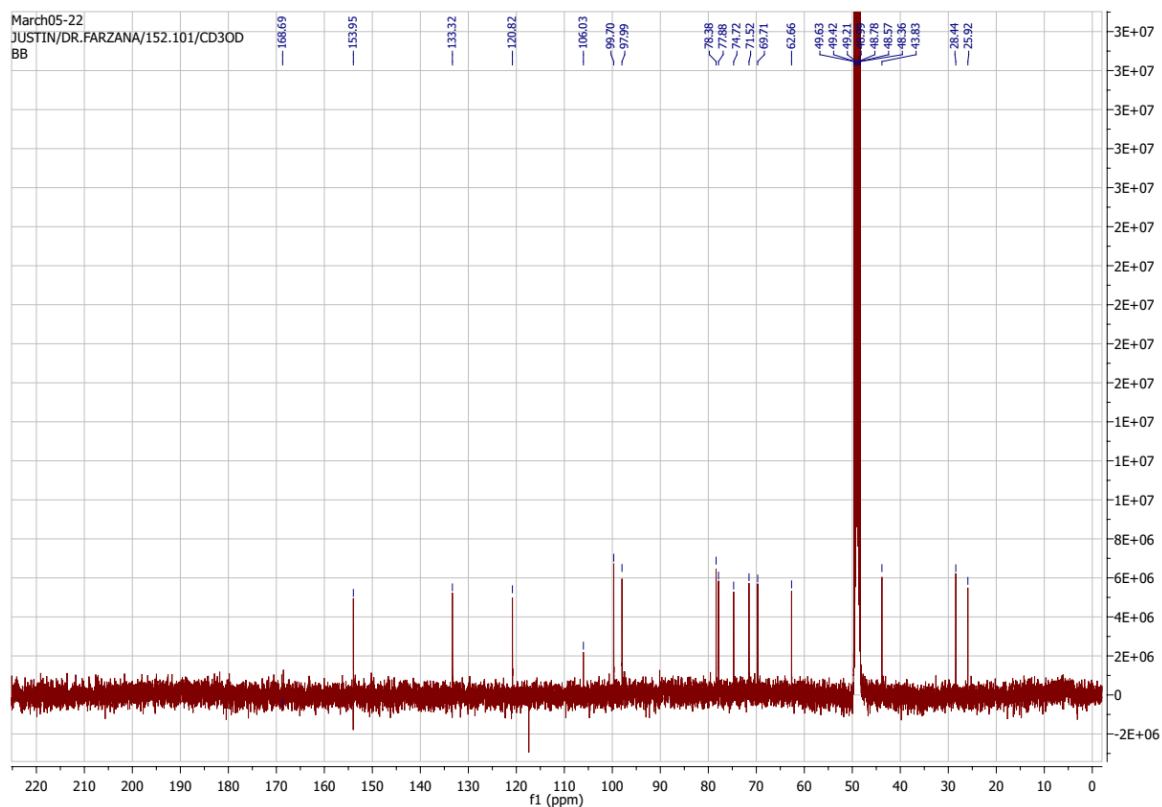

**Figure S6:**  $^{13}\text{C}$  NMR (101 MHz,  $\text{CD}_3\text{OD}$ ) spectrum of compound 1

HEJ-ICBS-LAB 101  
2/1/2022 10:27:51 AM

Page 1

File: R90-98-FABN Date Run: 02-01-2022 (Time Run: 10:24:26)  
Sample: R. JUSTIN /PROF. DR. FARZANA  
Instrument: JEOL-600H-2  
Inlet: Direct Probe Ionization mode: FAB-

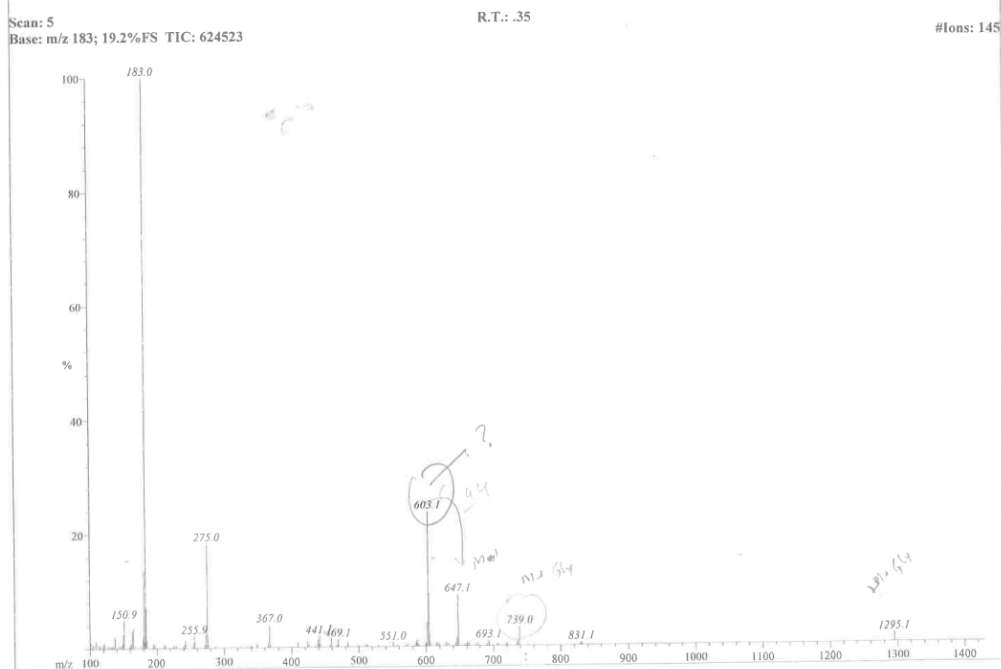

Figure S7: FABMS spectrum of compound 2

| HEJ-MASS LAB -ICCBS |                     |  | JEOL HX 110 MASS SPECTROMETER (FAB-HR) |                 |        |
|---------------------|---------------------|--|----------------------------------------|-----------------|--------|
| STUDENT NAME        | Justin              |  | SAMPLE CODE                            | DATE            | 8/4/22 |
| SUPERVISOR NAME     | Dr. Farzana Shaheen |  | R 90-98                                | FAB (+VE / -VE) | +VE    |

  

| Mass     | Theoretical Mass | Delta [ppm] | Delta [amu] | RDB  | Composition                                   |
|----------|------------------|-------------|-------------|------|-----------------------------------------------|
| 487.3225 | 487.3212         | 2.6         | 1.3         | 12.5 | $C_{33}H_{42}O_3 \rightarrow C_{33}H_{42}O_3$ |
|          | 487.3271         | -9.4        | -4.6        | 3.5  | $C_{28}H_{31}O_4$                             |
|          | 487.3365         | -28.7       | -14.0       | 16.5 | $C_{31}H_{42}O_3$                             |
|          | 487.3060         | 33.9        | 16.5        | 8.5  | $C_{30}H_{41}O_3$                             |
| 649.3739 | 649.3740         | -0.2        | -0.1        | 13.5 | $C_{39}H_{52}O_8 \rightarrow C_{39}H_{52}O_8$ |
|          | 649.3682         | 8.8         | 5.7         | 22.5 | $C_{38}H_{51}O_8$                             |
|          | 649.3799         | -9.3        | -6.0        | 4.5  | $C_{32}H_{41}O_{11}$                          |
|          | 649.3647         | 14.2        | 9.2         | 0.5  | $C_{38}H_{51}O_{11}$                          |

$34 - 21 = 13$   
 $40 - 26 = 14$

Figure S8: HRFABMS spectrum of compound 2

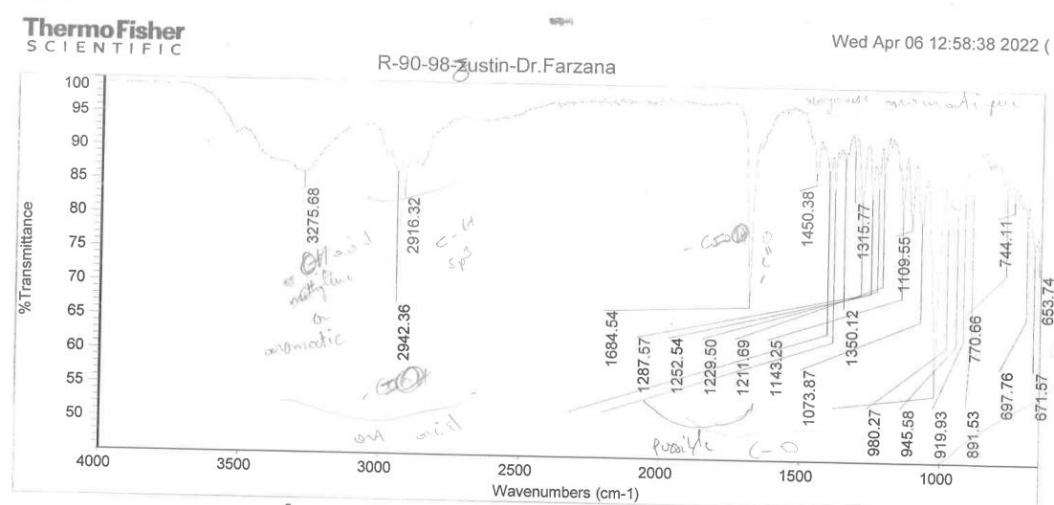

Number of sample scans: 16  
 Number of background scans: 16  
 Resolution: 4.000  
 Sample gain: 8.0  
 Optical velocity: 0.4747  
 Aperture: 80.00

No search results for the selected spectrum!

Figure S9: IR spectrum of compound 2

## THERMO ELECTRON ~ VISIONpro SOFTWARE V4.10

Operator Name Zainab Date of Report 4/7/2022  
Department Analytical Lab Nanotechnology center Time of Report 11:17:43AM  
Organization ICCBS, Karachi University  
Information Justin/Dr.Farzana

## Scan Graph

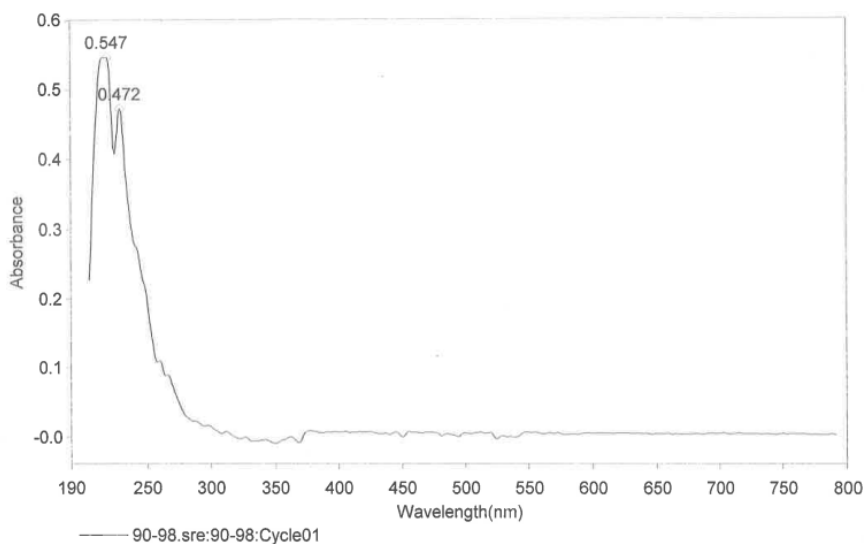

## Results Table - 90-98.sre,90-98,Cycle01

| nm     | A     | Peak Pick Method             |
|--------|-------|------------------------------|
| 219.00 | 0.547 | Find 8 Peaks Above -3.0000 A |
| 229.00 | 0.472 | Start Wavelength190.00 nm    |
|        |       | Stop Wavelength800.00 nm     |
|        |       | Sort By Wavelength           |

Sensitivity Auto

Figure S10: UV/UV-Visible (MeOH) spectrum of compound 2

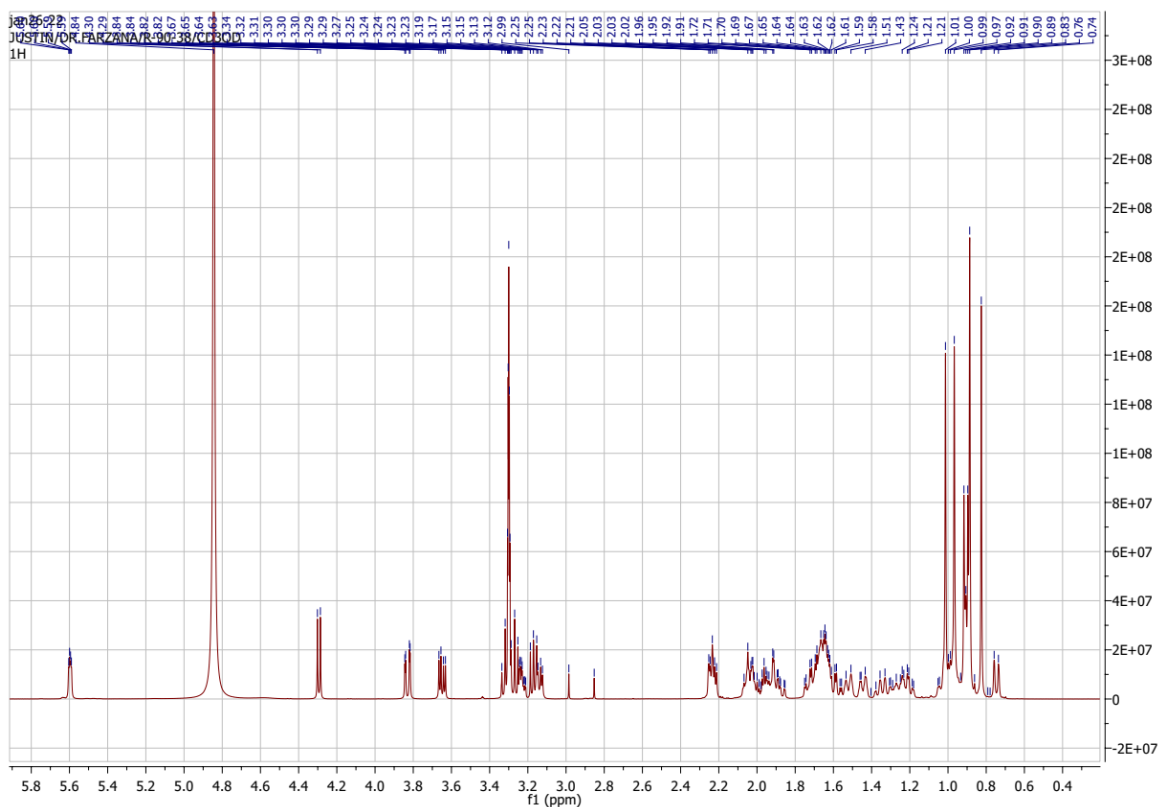

Figure S11: <sup>1</sup>H NMR (500 MHz, CD<sub>3</sub>OD) spectrum of compound 2

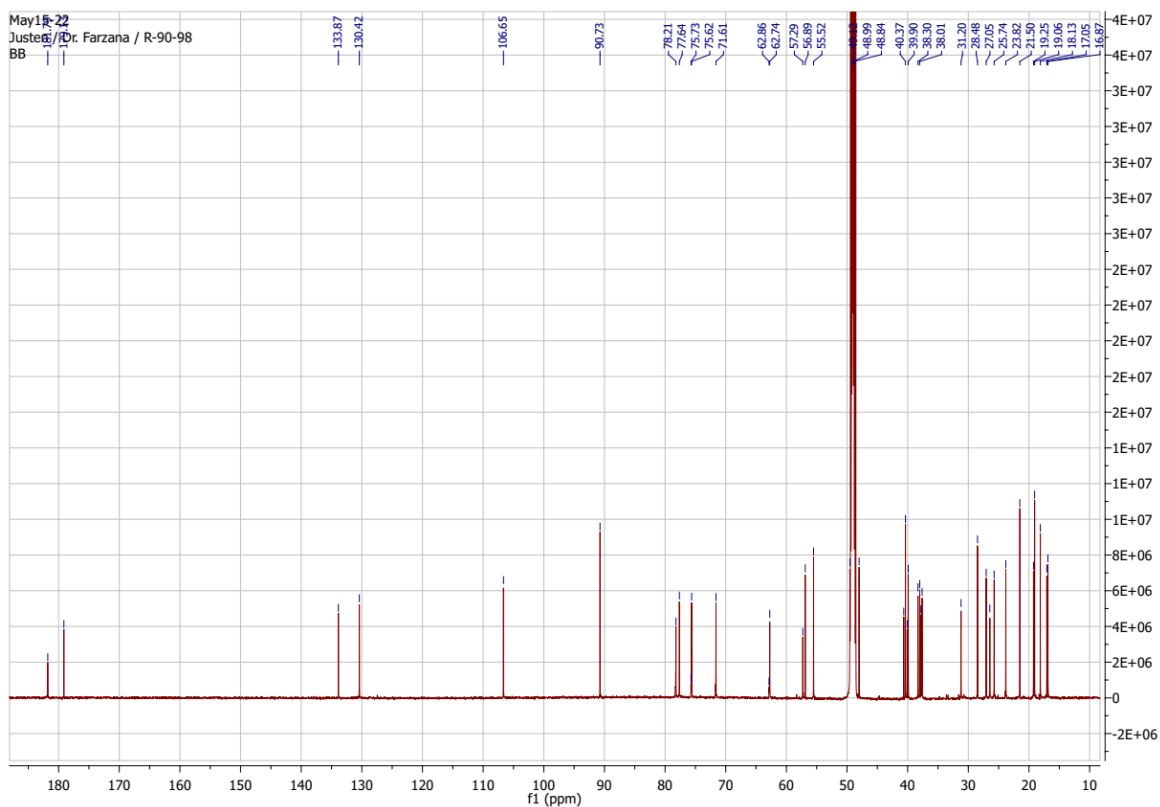



**Figure S12:**  $^{13}\text{C}$  NMR (151 MHz,  $\text{CD}_3\text{OD}$ ) spectrum of compound 2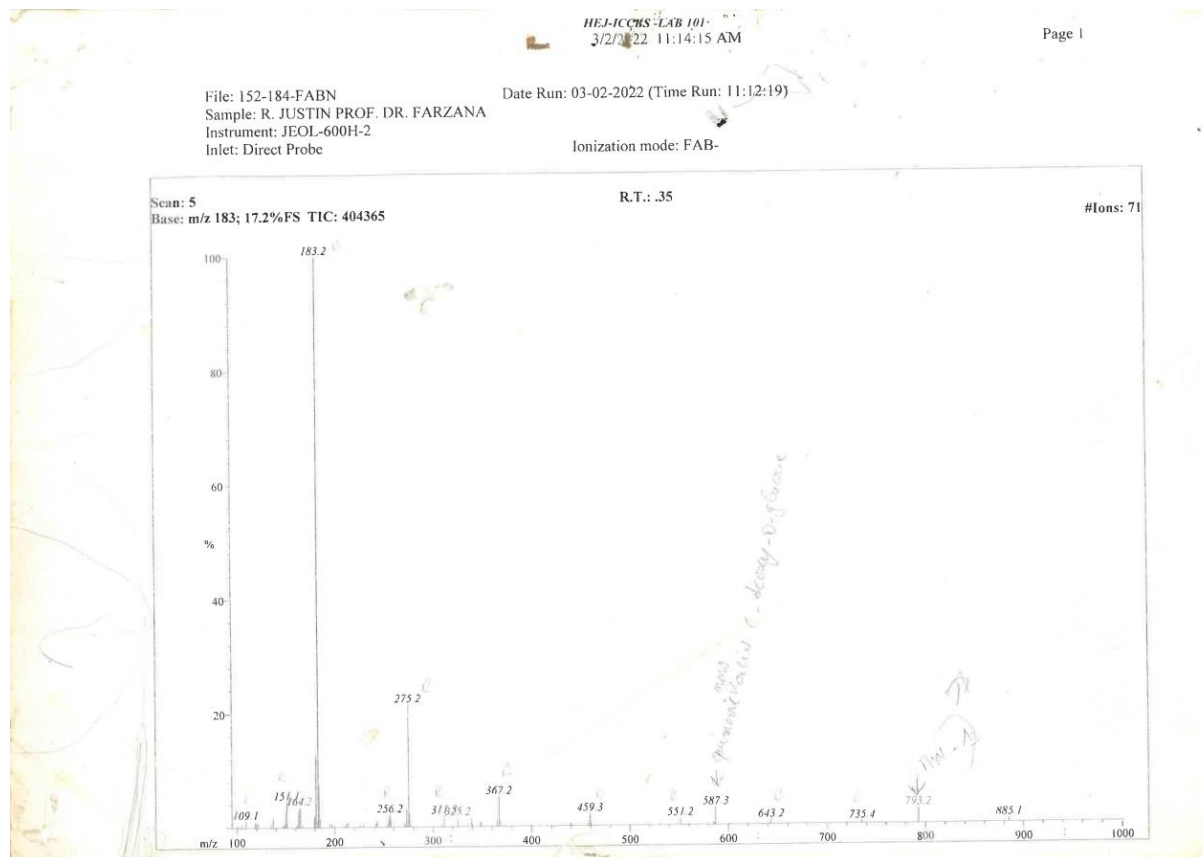**Figure S13:** FABMS spectrum of compound 3

| HEJ-MASS LAB -ICCBS |                     |             |             | JEOL HX 110 MASS SPECTROMETER (FAB-HR) |                 |                                        |
|---------------------|---------------------|-------------|-------------|----------------------------------------|-----------------|----------------------------------------|
| STUDENT NAME        | R. JUSTIN           |             |             | SAMPLE CODE                            | DATE            | 7/3/2022                               |
| SUPERVISOR NAME     | DR. FARZANA SHAHEEN |             |             | R-157-184                              | FAB (+VE / -VE) | +VE MODE                               |
| Measured Mass       | Theoretical Mass    | Delta [ppm] | Delta [mmu] | RDB                                    | Composition     |                                        |
| 795.3114            | 795.311             | 0.4         | 0.4         | 35.5                                   | C56 H43 O5      | $C_{56}H_{42}O_5$ $m/z = 57 - 22 = 36$ |
|                     | 795.3075            | 4.9         | 3.9         | 13.5                                   | C38 H51 O18     |                                        |
|                     | 795.3169            | -6.9        | -5.5        | 26.5                                   | C49 H47 O10     |                                        |
|                     | 795.3017            | 12.2        | 9.7         | 22.5                                   | C45 H47 O13     |                                        |
|                     | 795.3228            | -14.3       | -11.4       | 17.5                                   | C42 H51 O15     | $C_{56}H_{40}O_5$ $m/z = 57 - 20 = 37$ |
| 793.2958            | 793.2954            | 0.5         | 0.4         | 36.5                                   | C56 H41 O5      |                                        |
|                     | 793.2919            | 4.9         | 3.9         | 14.5                                   | C38 H49 O18     |                                        |
|                     | 793.3013            | -6.9        | -5.5        | 27.5                                   | C49 H45 O10     |                                        |
|                     | 793.286             | 12.3        | 9.8         | 23.5                                   | C45 H45 O13     |                                        |
|                     | 793.3071            | -14.3       | -11.3       | 18.5                                   | C42 H49 O15     |                                        |

**Figure S14:** HRFABMS spectrum of compound 3

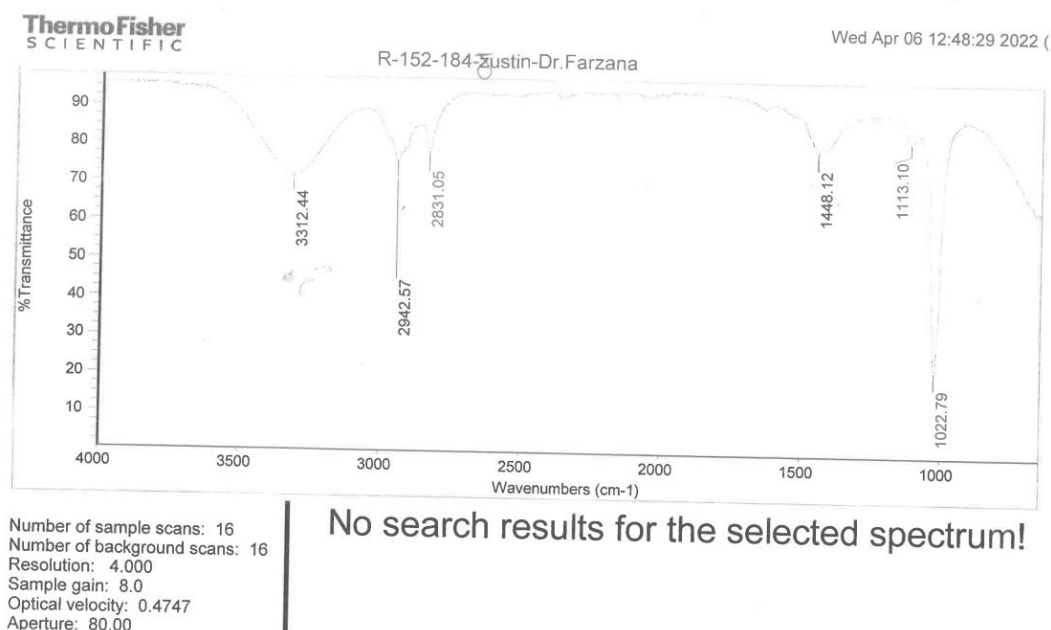

Figure S15: IR spectrum of compound 3

## THERMO ELECTRON ~ VISIONpro SOFTWARE V4.10

Operator Name Zainab Date of Report 4/7/2022  
 Department Analytical Lab Nanotechnology center Time of Report 11:17:54AM  
 Organization ICCBS, Karachi University  
 Information Justin/Dr.Farzana

## Scan Graph

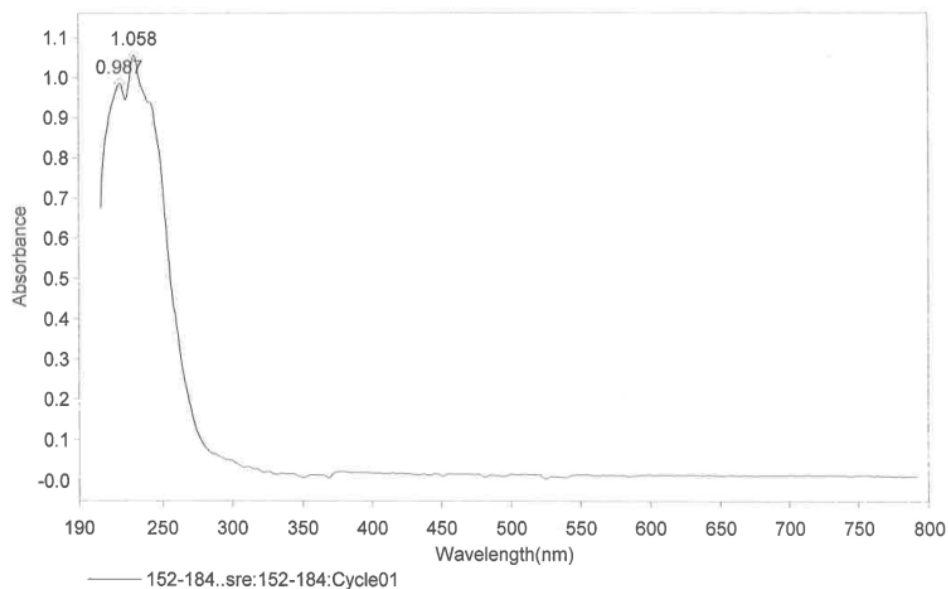

## Results Table - 152-184..sr:152-184,Cycle01

| nm     | A     | Peak Pick Method             |
|--------|-------|------------------------------|
| 220.00 | 0.987 | Find 8 Peaks Above -3.0000 A |
| 230.00 | 1.058 | Start Wavelength 190.00 nm   |
|        |       | Stop Wavelength 800.00 nm    |
|        |       | Sort By Wavelength           |

Sensitivity Auto

Figure S16: UV/UV-Visible (MeOH) spectrum of compound 3

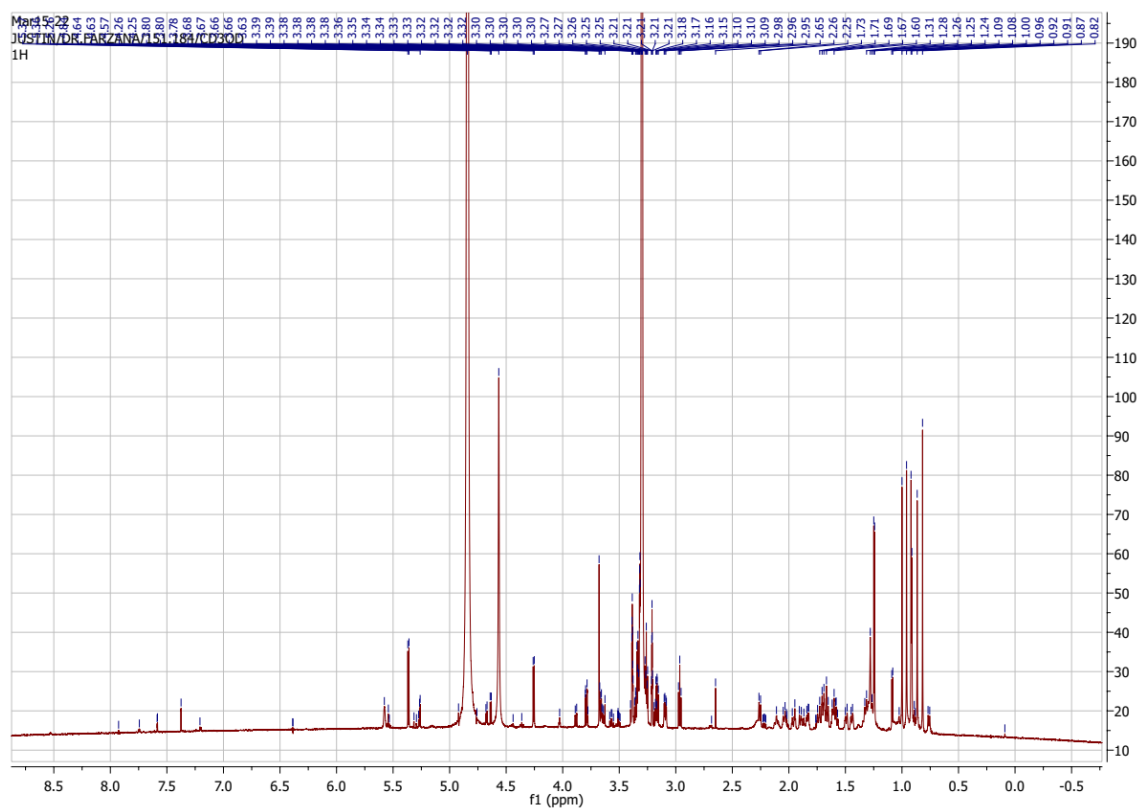Figure S17: <sup>1</sup>H NMR (400 MHz, CD<sub>3</sub>OD) spectrum of compound 3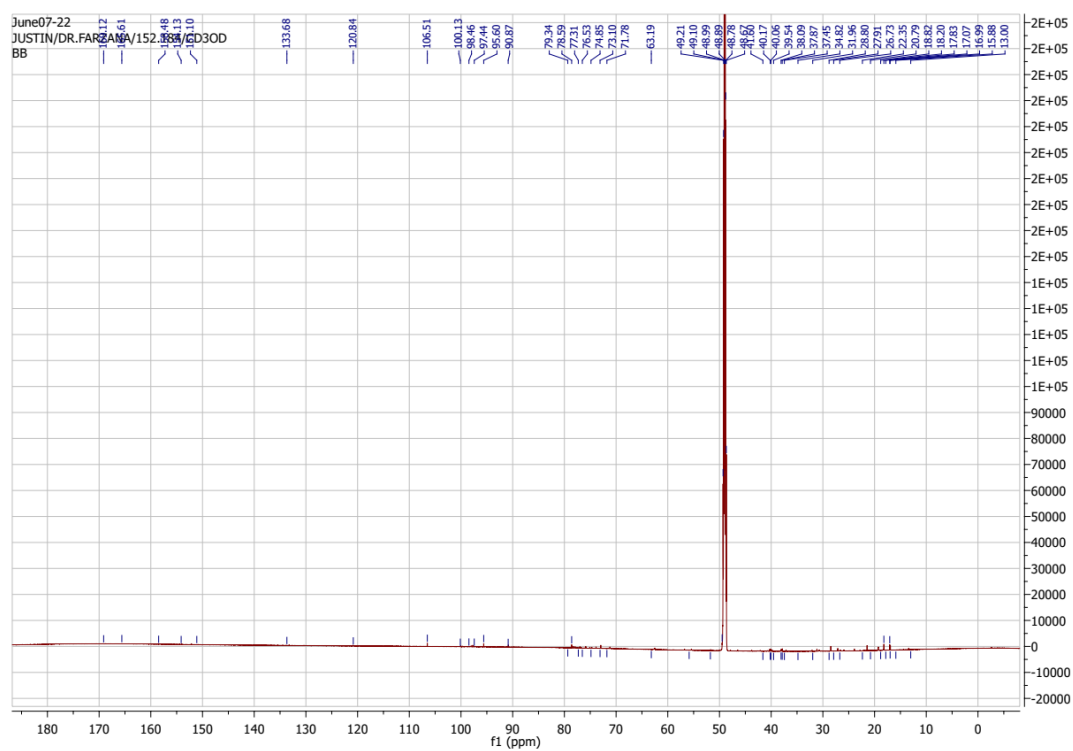

**Figure S18:**  $^{13}\text{C}$  NMR (201 MHz,  $\text{CD}_3\text{OD}$ ) spectrum of compound 3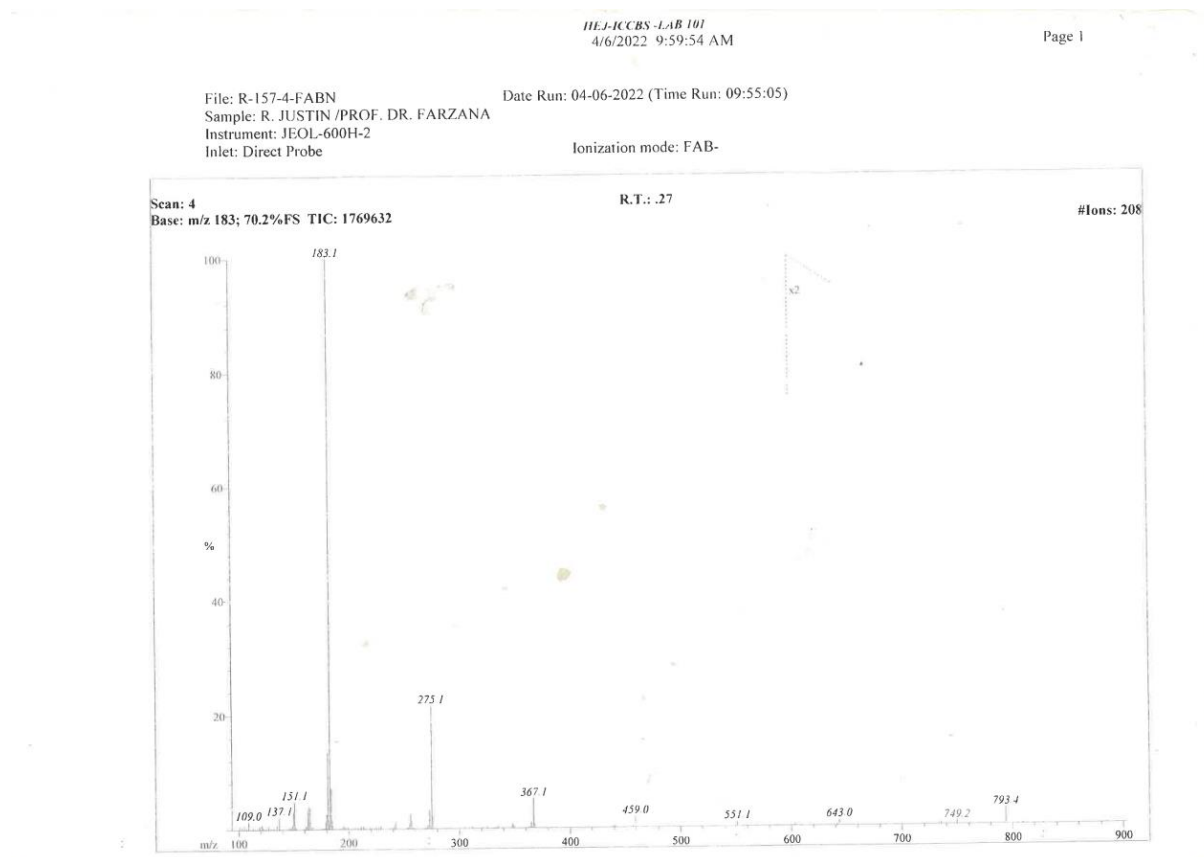**Figure S19:** FABMS spectrum of compound 4

## THERMO ELECTRON ~ VISIONpro SOFTWARE V4.10

Operator Name Zainab Date of Report 4/7/2022  
 Department Analytical Lab Nanotechnology center Time of Report 11:18:07AM  
 Organization ICCBS, Karachi University  
 Information Justin/Dr.Farzana

## Scan Graph

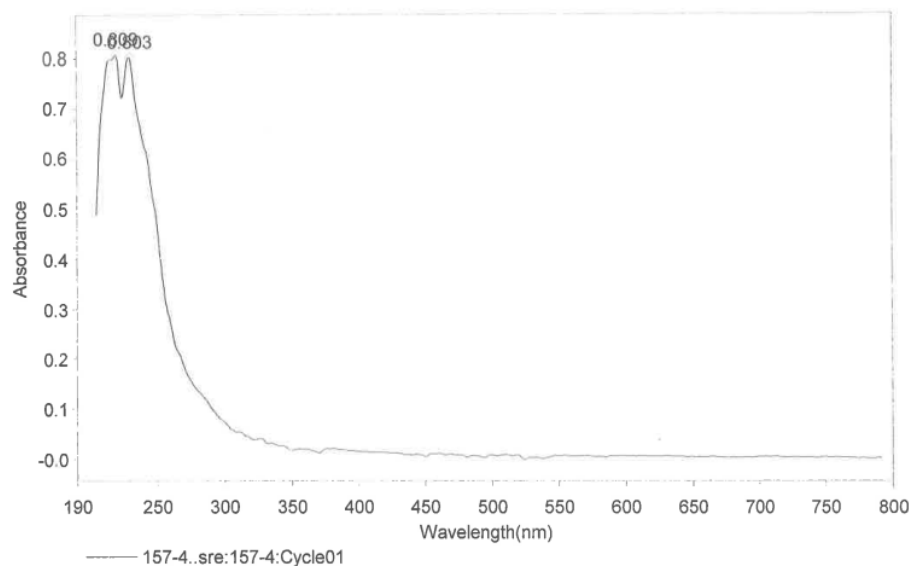

## Results Table - 157-4...sre,157-4,Cycle01

| nm     | A     | Peak Pick Method             |
|--------|-------|------------------------------|
| 220.00 | 0.809 | Find 8 Peaks Above -3.0000 A |
| 230.00 | 0.803 | Start Wavelength 190.00 nm   |
|        |       | Stop Wavelength 800.00 nm    |
|        |       | Sort By Wavelength           |

Sensitivity Auto

Figure S20: UV/UV-Visible (MeOH) spectrum of compound 4

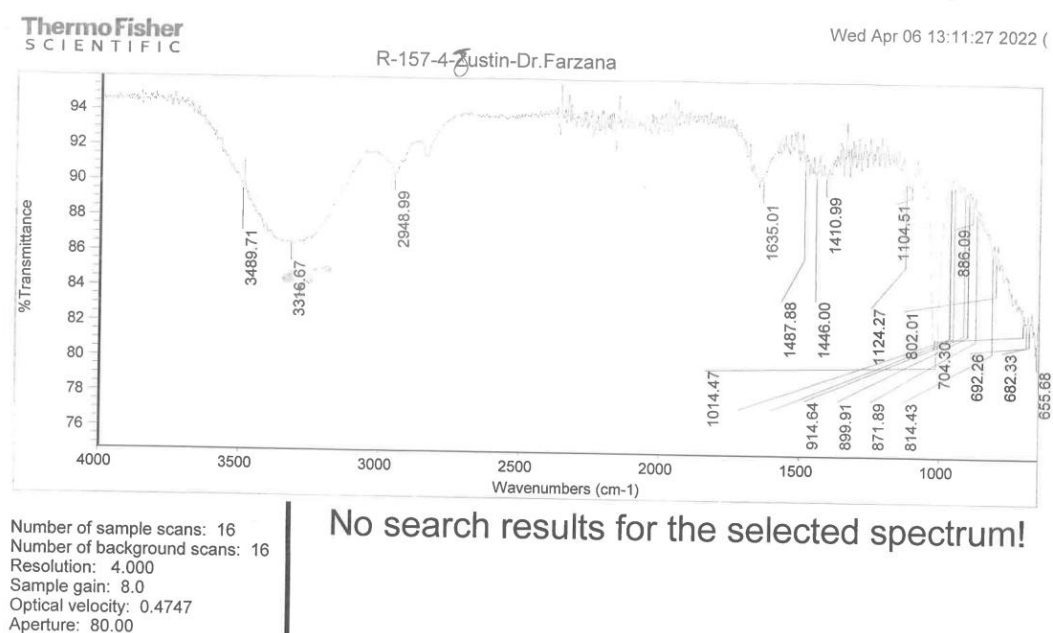

Figure S21: IR spectrum of compound 4

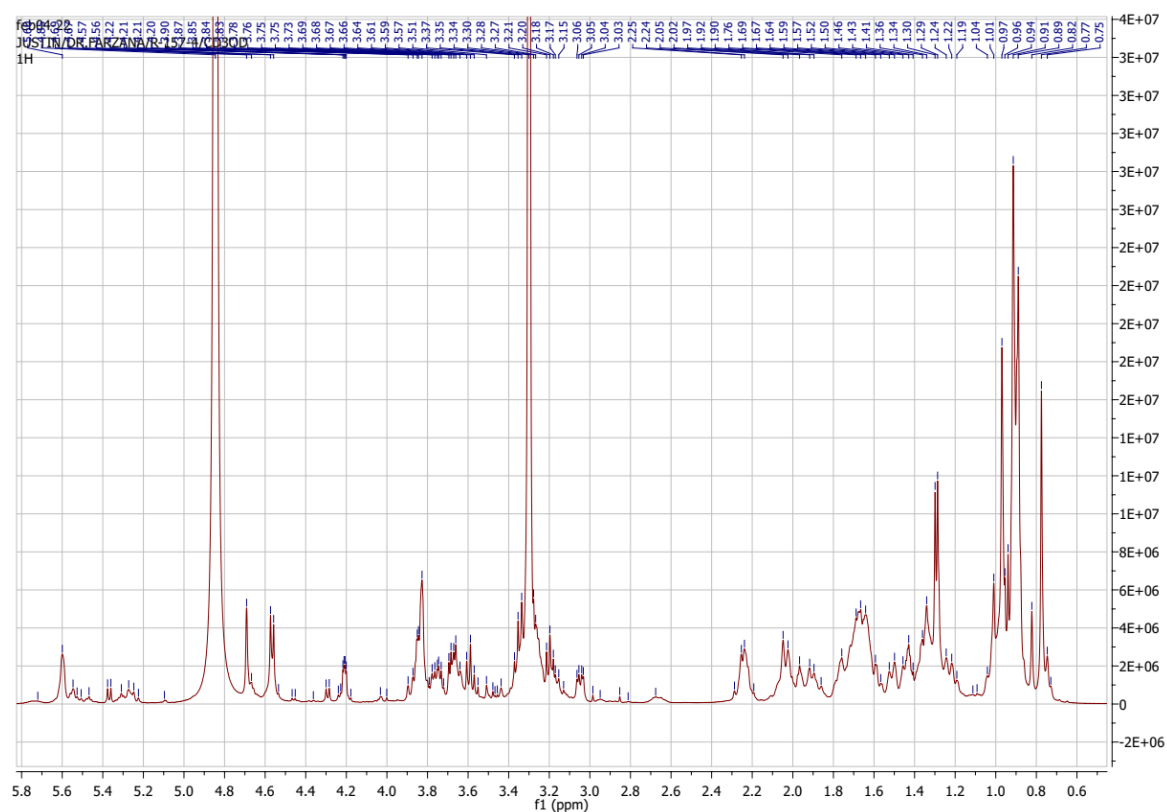Figure S22: <sup>1</sup>H NMR (500 MHz, CD<sub>3</sub>OD) spectrum of compound 4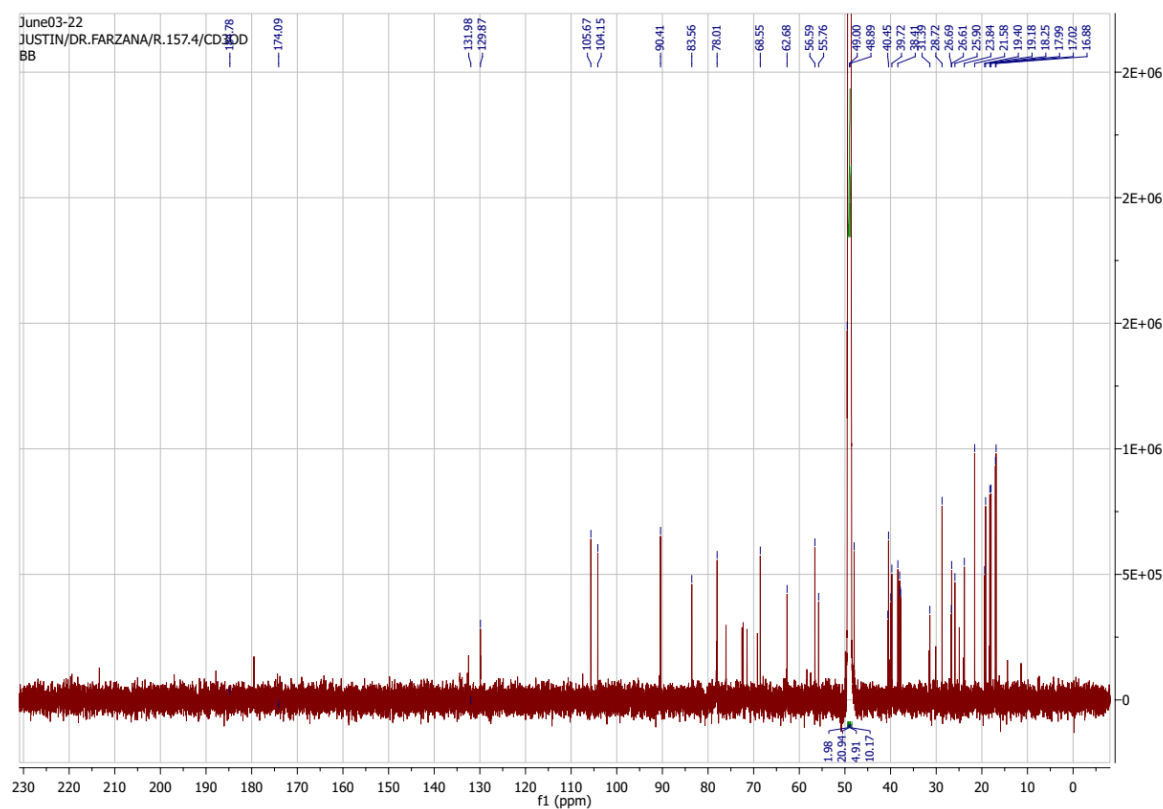

**Figure S23:**  $^{13}\text{C}$  NMR (201 MHz,  $\text{CD}_3\text{OD}$ ) spectrum of compound 4**Table S1:** *In-vitro* antiglycation activity fluorescence of *M. inermis* and *T. indica* plants fractions

| Parts            | Extracts Code                     | Concentrations | Fluorescence ± SD | % Inhibition ± SD |
|------------------|-----------------------------------|----------------|-------------------|-------------------|
| Blank            | BSA-alone                         | NA             | 6.93 ± 0.09       | NA                |
| AGEs Control     | Fructose-BSA                      | NA             | 81.30 ± 0.45      | NA                |
| Positive Control | Rutin                             | 1 mM           | 7.53 ± 0.30       | 91 ± 0.80         |
| M. inermis       |                                   |                |                   |                   |
| Leaf             | Decoction                         | 1mg/mL         | 13.93 ± 0.51      | 82.87 ± 0.63      |
|                  |                                   | 0.5mg/mL       | 17.93 ± 0.54      | 77.94 ± 0.66      |
|                  |                                   | 0.25mg/mL      | 22.88 ± 0.82      | 71.86 ± 1.01      |
|                  | Ethyl acetate + Butanol + Acetone | 1mg/mL         | 11.78 ± 0.14      | 85.50 ± 0.17      |
|                  |                                   | 0.5mg/mL       | 12.76 ± 0.16      | 84.30 ± 0.20      |
|                  |                                   | 0.25mg/mL      | 14.12 ± 0.08      | 82.63 ± 0.10      |
| Stem             | Ethyl Acetate + Acetone           | 1mg/mL         | 25.98 ± 0.63      | 68.04± 0.78       |
|                  |                                   | 0.5mg/mL       | 26.31 ± 0.88      | 67.64± 1.09       |
|                  |                                   | 0.25mg/mL      | 33.46 ± 4.74      | 61.95± 2.07       |
| Root             | Ethyl Acetate + Acetone           | 1mg/mL         | 25.73 ± 0.38      | 68.34± 0.47       |
|                  |                                   | 0.5mg/mL       | 28.67 ± 0.24      | 64.74± 0.29       |
|                  |                                   | 0.25mg/mL      | 37.41 ± 0.47      | 53.99± 0.58       |
| T. indica        |                                   |                |                   |                   |
| Leaf             | Ethyl Acetate + Butanol           | 1mg/mL         | 12.21 ± 0.21      | 84.97 ± 0.26      |
|                  |                                   | 0.5mg/mL       | 14.97 ± 0.61      | 81.59 ± 0.75      |
|                  |                                   | 0.25mg/mL      | 20.51 ± 0.65      | 74.77 ± 0.80      |
|                  | Acetone                           | 1mg/mL         | 8.41 ± 0.19       | 89.66 ± 0.23      |
|                  |                                   | 0.5mg/mL       | 9.98 ± 0.44       | 87.72 ± 0.55      |
|                  |                                   | 0.25mg/mL      | 15.29 ± 1.21      | 81.19 ± 1.49      |
| Stem             | Ethyl Acetate + Acetone           | 1mg/mL         | 6.65 ± 0.17       | 91.82± 0.21       |
|                  |                                   | 0.5mg/mL       | 7.64 ± 0.23       | 90.60± 0.28       |
|                  |                                   | 0.25mg/mL      | 9.65 ± 0.18       | 88.12± 0.23       |
| Root             | Ethyl Acetate + Acetone           | 1mg/mL         | 8.91 ± 0.21       | 89.03± 0.25       |
|                  |                                   | 0.5mg/mL       | 10.11 ± 0.01      | 87.56± 0.001      |
|                  |                                   | 0.25mg/mL      | 11.82 ± 0.37      | 85.45± 0.46       |
